# Supplementary material
Source: PubMed Central journal article supplement (PMC2827822)
Supplement: supp_92_3_686__1.pdf [file supp_92_3_686__1.pdf]

TABLE E-1 Comprehensive Mortality Data in Patients with Fibrodysplasia Ossificans Progressiva

| Case | Year of Birth | Sex | Age at Death | Cause of Death* |
|------|---------------|-----|--------------|-----------------|
| 1    | 1921          | F   | 77           | U               |
| 2    | 1931          | F   | 70           | U               |
| 3    | 1933          | M   | 40           | P               |
| 4    | 1942          | F   | 60           | P               |
| 5    | 1944          | M   | 60           | U               |
| 6    | 1945          | F   | 56           | CR              |
| 7    | 1945          | F   | 41           | CR              |
| 8    | 1945          | F   | 48           | CR              |
| 9    | 1946          | M   | 56           | S               |
| 10   | 1947          | F   | 60           | P               |
| 11   | 1947          | F   | 58           | CR              |
| 12   | 1947          | F   | 52           | CR              |
| 13   | 1948          | M   | 41           | CR              |
| 14   | 1949          | M   | 52           | S               |
| 15   | 1950          | F   | 49           | U               |
| 16   | 1951          | M   | 51           | CR              |
| 17   | 1951          | M   | 48           | CR              |
| 18   | 1952          | M   | 51           | CR              |
| 19   | 1953          | M   | 51           | CR              |
| 20   | 1954          | F   | 46           | CR              |
| 21   | 1954          | F   | 38           | CR              |
| 22   | 1954          | M   | 41           | U               |
| 23   | 1954          | F   | 48           | CR              |
| 24   | 1955          | M   | 41           | U               |
| 25   | 1955          | M   | 50           | CR              |
| 26   | 1957          | F   | 40           | CR              |
| 27   | 1958          | M   | 46           | F               |
| 28   | 1958          | M   | 28           | IO              |
| 29   | 1958          | M   | 45           | CR              |
| 30   | 1958          | M   | 40           | F               |
| 31   | 1959          | M   | 46           | S               |
| 32   | 1959          | M   | 39           | U               |
| 33   | 1960          | F   | 40           | CR              |
| 34   | 1960          | M   | 45           | P               |
| 35   | 1961          | M   | 43           | CR              |
| 36   | 1961          | F   | 36           | U               |
| 37   | 1962          | M   | 30           | E               |
| 38   | 1962          | F   | 38           | U               |
| 39   | 1963          | F   | 39           | CR              |
| 40   | 1963          | M   | 37           | U               |
| 41   | 1964          | F   | 41           | F               |
| 42   | 1967          | M   | 37           | U               |

|    |      |   |    |     |
|----|------|---|----|-----|
| 43 | 1967 | F | 38 | U   |
| 44 | 1968 | F | 37 | F   |
| 45 | 1969 | M | 36 | CR  |
| 46 | 1969 | F | 15 | GA  |
| 47 | 1971 | F | 34 | CR  |
| 48 | 1971 | F | 32 | F   |
| 49 | 1973 | F | 31 | P   |
| 50 | 1976 | M | 25 | MVA |
| 51 | 1976 | M | 15 | T   |
| 52 | 1976 | F | 28 | P   |
| 53 | 1976 | M | 30 | P   |
| 54 | 1978 | F | 21 | CR  |
| 55 | 1980 | M | 23 | CR  |
| 56 | 1981 | M | 11 | CR  |
| 57 | 1993 | F | 12 | GA  |
| 58 | 1994 | M | 9  | CR  |
| 59 | 1997 | F | 8  | CR  |
| 60 | 2000 | F | 3  | D   |

\*CR = cardiorespiratory, D = drowning, E = suicide, F = complications of a fall, GA = complications of general anesthesia, IO = intestinal obstruction, MVA = motor vehicle accident, P = pneumonia, S = sepsis, T = starvation, and U = unknown.
